## RESEARCH ARTICLE

# Role and knowledge of nurses in the management of non-communicable diseases in Africa: A scoping review

Jean Toniolo<sup>1,2,3\*</sup>, Edgard Brice Ngougou<sup>1,2,4</sup>, Pierre-Marie Preux<sup>1</sup>, Pascale Beloni<sup>1,3</sup>

**1** Inserm U1094, IRD UMR270, Univ. Limoges, CHU Limoges, EpiMaCT - Epidemiology of Chronic Diseases in Tropical Zone, Institute of Epidemiology and Tropical Neurology, OmegaHealth, Limoges, France, **2** Département d'Epidémiologie Biostatistiques et Informatique Médicale (DEBIM)/ Unité de Recherche en Epidémiologie des Maladies Chroniques et Santé Environnement (UREMCSE), Faculté de Médecine, Université des Sciences de la Santé, Owendo, Gabon, **3** Département Universitaire de Sciences Infirmières, Faculté de Médecine et Pharmacie, Université de Limoges, Limoges, France, **4** Centre d'Epidémiologie, de Biostatistique, et de Méthodologie de la Recherche-Gabon (CEBIMER-Gabon), Institut Supérieur de Biologie Médicale (ISBM), Université des Sciences de la Santé, Owendo, Gabon

\* [jean.toniolo@chu-limoges.fr](mailto:jean.toniolo@chu-limoges.fr)

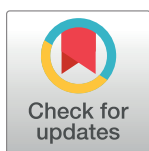

## Abstract

### OPEN ACCESS

**Citation:** Toniolo J, Ngougou EB, Preux P-M, Beloni P (2024) Role and knowledge of nurses in the management of non-communicable diseases in Africa: A scoping review. PLoS ONE 19(4): e0297165. <https://doi.org/10.1371/journal.pone.0297165>

**Editor:** Ermel Johnson, Université de Parakou, BENIN

**Received:** May 23, 2023

**Accepted:** December 30, 2023

**Published:** April 18, 2024

**Peer Review History:** PLOS recognizes the benefits of transparency in the peer review process; therefore, we enable the publication of all of the content of peer review and author responses alongside final, published articles. The editorial history of this article is available here: <https://doi.org/10.1371/journal.pone.0297165>

**Copyright:** © 2024 Toniolo et al. This is an open access article distributed under the terms of the [Creative Commons Attribution License](https://creativecommons.org/licenses/by/4.0/), which permits unrestricted use, distribution, and reproduction in any medium, provided the original author and source are credited.

**Data Availability Statement:** All relevant data are within the paper and its [Supporting Information](#) files.

## Background

31.4 million people in low- and middle-income countries die from chronic diseases annually, particularly in Africa. To address this, strategies such as task-shifting from doctors to nurses have been proposed and have been endorsed by the World Health Organization as a potential solution; however, no comprehensive review exists describing the extent of nurse-led chronic disease management in Africa.

## Aims

This study aimed to provide a thorough description of the current roles of nurses in managing chronic diseases in Africa, identify their levels of knowledge, the challenges, and gaps they encounter in this endeavor.

## Methods

We performed a scoping review following the key points of the Cochrane Handbook, and two researchers independently realized each step. Searches were conducted using five databases: MEDLINE, PsycINFO, CINAHL, Web of Science, and Embase, between October 2021 and April 2023. A descriptive analysis of the included studies was conducted, and the quality of the studies was assessed using the Downs and Black Scale.

## Results

Our scoping review included 111 studies from 20 African countries, with South Africa, Nigeria, and Ghana being the most represented. Findings from the included studies revealed varying levels of knowledge. Nurses were found to be actively involved in managing common chronic diseases from diagnosis to treatment. Facilitating factors included

**Funding:** The authors received no specific funding for this work.

**Competing interests:** The authors have declared that no competing interests exist.

comprehensive training, close supervision by physicians, utilization of decision trees, and mentorship. However, several barriers were identified, such as a shortage of nurses, lack of essential materials, and inadequate initial training.

## Conclusion

There is significant potential for nurses to enhance the screening, diagnosis, and treatment of chronic diseases in Africa. Achieving this requires a combination of rigorous training and effective supervision, supported by robust policies. To address varying levels of knowledge, tailored training programs should be devised. Further research is warranted to establish the effectiveness of nurse-led interventions on population health outcomes.

## Introduction

Africa is currently facing a double challenge linked to epidemiological transition [1, 2]. This transition involves the emergence of chronic diseases in an environment where infectious diseases continue to prevail [2]. Contributing factors include changes in health habits, such as tobacco and alcohol use, as well as economic development and urbanization. As the prevalence of chronic diseases increases, they significantly impact health outcomes and the healthcare system [1, 2].

Chronic diseases, also known as non-communicable diseases (NCDs), are characterized by their non-transmissible occurrence and duration, lasting for three months or more [3]. The World Health Organization (WHO) defines non-communicable diseases as diseases that do not spread from person to person and typically have a long disease duration with slow progression [4]. The main types of NCDs include cardiovascular diseases, cancer, chronic respiratory diseases, and diabetes, with neurological disorders and mental health issues often included in this category. Annually, chronic diseases account for the death of 41 million people worldwide, representing approximately 71% of global deaths, with three-quarters of these deaths (31.4 million) occurring in low- and middle-income countries, notably in Africa [5, 6].

Efficient management of these pathologies with modifiable risk factors necessitates access to care and prevention measures to mitigate their impact on the healthcare system. However, a key challenge faced by African health systems is the shortage of healthcare personnel, with limited resources and an overwhelming workload [7]. For instance, there are only 0.29 doctors and 1.88 nurses per 1000 people in the region [8, 9].

In line with the goal of universal health coverage by 2030, the WHO acknowledges that nurses could be a viable solution to help manage chronic diseases [10–12]. Implementing task-shifting strategies from physicians to nurses is safe and effective in chronic disease management [13, 14]. Task shifting is defined as the transfer of tasks from doctors to nurses [13]. However, the role of nurses in chronic disease management is not limited to this. Chronic disease management activities in primary care include tasks such as taking vital signs, education on healthy diets, lifestyle advice, chronic disease education, and chronic disease clinics [15]. In northern countries, nurses provide NCDs care in a variety of settings, independently and collaboratively, with clinical, managerial, and accountability responsibilities [15, 16]. Furthermore, various strategies have already been tested in the African context to manage infectious diseases, such as task-shifting from doctors to nurses. This approach proved successful in HIV management, where nurses' role enhanced antiretroviral therapy access, and improved patient retention, knowledge, and comfort [13, 17].

Nurses already contribute to managing chronic diseases in Africa, even though it is pertinent to emphasize that there are no systematic country-specific definitions for nursing care in the management of chronic diseases in Africa [18]. Indeed not all countries have policies in place to regulate the nursing profession and nursing care [18]. To define nursing and standardize nursing education and training programs, the West African Health Organization proposed a specific curriculum in 2014 to guide the nursing profession with ten core competencies [19]. These competencies encompass the analysis of functions related to nursing and obstetrical practices; the handling of clinical situations by referring to the physiology and diseases of the human body; intervention in community health; application of methods and techniques of nursing and obstetrics; application of research processes; management of nursing and obstetrical care; promotion, prevention, and rehabilitative care for the "mother and child; administration of nursing care; management of medico-surgical pathologies; and provision of culturally acceptable and high-quality care during pregnancy, childbirth, and delivery, with the ability to manage specific emergency situations to maximize the health of women and their newborns [19]. To note, the program allocated only 20 hours of coursework, specifically for chronic diseases raising questions on nurse knowledge and involvement in chronic disease management. To our knowledge, no comprehensive review has described their roles and knowledge in this context. Consequently, there is a pressing need to clearly outline the role of nurses in chronic disease management and their level of knowledge in Africa. This would facilitate the design of national strategies for nurse-led chronic disease management.

Our review question was: *What were the nurses' roles and knowledge in managing NCDs in Africa?*

We aimed to provide a thorough description of the current roles of nurses in managing NCDs in Africa and identify their levels of knowledge, challenges, and gaps they encounter.

## Methods

We conducted a scoping review [20] following the key points outlined in the Cochrane Handbook [21] from October 01, 2021, to February 10, 2022, with an update conducted before publication, extending until April 30, 2023. This study and its protocol were registered in the PROSPERO database (CRD42021267403). This study was reported following the Preferred Items for Systematic Reviews and Meta-Analyses (PRISMA) guidelines [22].

## Search strategy

To identify relevant articles for review, five databases were searched: MEDLINE, Web of Science, Embase, CINALH, and PyscINFO [23].

The search strategy used a combination of subject headings and keywords of the main topics of the review: nursing, noncommunicable diseases, and Africa. Additionally, a "title and abstract" search was performed for MEDLINE. The search strategy was adapted to suit the specificities of each database for the others. The search strategy used for each database are available in [S1 Table](#).

**Inclusion and exclusion criteria.** Based on the review question, the inclusion criteria were defined using the PICOS framework. For the "population" item, all studies focusing on nurses' NCDs management, nurses' knowledge of NCDs, or adult patients receiving nursing intervention for NCDs management in Africa were included. Regarding the "intervention" item, studies describing all nurse-led activities regarding chronic diseases [i.e., tasks done by nurses to manage chronic disease, including those that are habitually performed by physicians [13]) or nurses' chronic diseases knowledge evaluation were included. The "comparison" item was not defined because our review did not focus solely on interventional studies. The

“Outcomes” items were defined as the efficacy of nursing interventions, nurses’ level of knowledge regarding NCDs, and gaps and challenges linked to nurses’ NCDs management. For the “study design” item, we included all study designs relevant to our topic. No language or publication date exclusion criteria were applied. Studies that did not specify specific outcomes for nurses were excluded. Studies were also excluded if they were incomplete study protocols or ongoing studies, editorials, conference proceedings, or if they were published in non-peer-reviewed journals.

### Selection and data collection processes

Rayyan QRCI tool was used to export all identified articles and remove duplicates.

The study selection process was conducted independently by two researchers who were unaware to each other’s decisions in the two phases. Initially, studies were identified by reading the titles and abstracts, and eligible articles were then fully read. If disagreements arose, a third researcher was consulted.

### Data extraction and data synthesis

Data extraction was systematically performed using an Excel spreadsheet that included information such as the first author’s name, publication year, journal, country where the study was conducted, main objective, study design, disease, intervention/nursing care of interest, sample characteristics, results regarding the intervention/impact of nursing care, facilitators, barriers, and study limitations identified by the authors. A descriptive synthesis was employed, and no meta-analysis was performed. Subgroup analyses were carried out based on disease type and study location.

### Quality assessment

The bias and quality of each study were evaluated. Quantitative studies were evaluated using the Downs and Black scale[24]. Qualitative studies, were evaluated using the specific EQUATOR guidelines [25].

Ethical approval was not required for this study.

### Results

The PRISMA flowchart summarizing the selection process is shown in [Fig 1](#). Following the removal of duplicates, we screened a total of 3,464 articles. Of these, 3,009 were excluded as their titles and abstracts did not align with our specified criteria. Among the remaining 455 articles, a thorough review was conducted, leading to the identification of 111 articles that met our inclusion criteria and were subsequently included into this scoping review.

### Description of the selected studies

[S2 Table](#) describes the characteristics of each study. Among the 111 studies, 42 had a cross-sectional design, 19 were qualitative, 12 were prospective interventional non-randomized, 10 were retrospective data analysis, eight were randomized (controlled, cluster, or pilot), eight were quasi-experimental, five were descriptive, four were cohort studies, and three were mixed-method. Publication years ranged from 1985 to 2023. The results of the studies concerned 6,031 nurses and 182,791 patients from 20 African countries. The repartition of the studies in Africa is shown in [Fig 2](#). South Africa was the country with the most important number of studies related to our review (n = 28), followed by Nigeria (n = 16), and Ghana

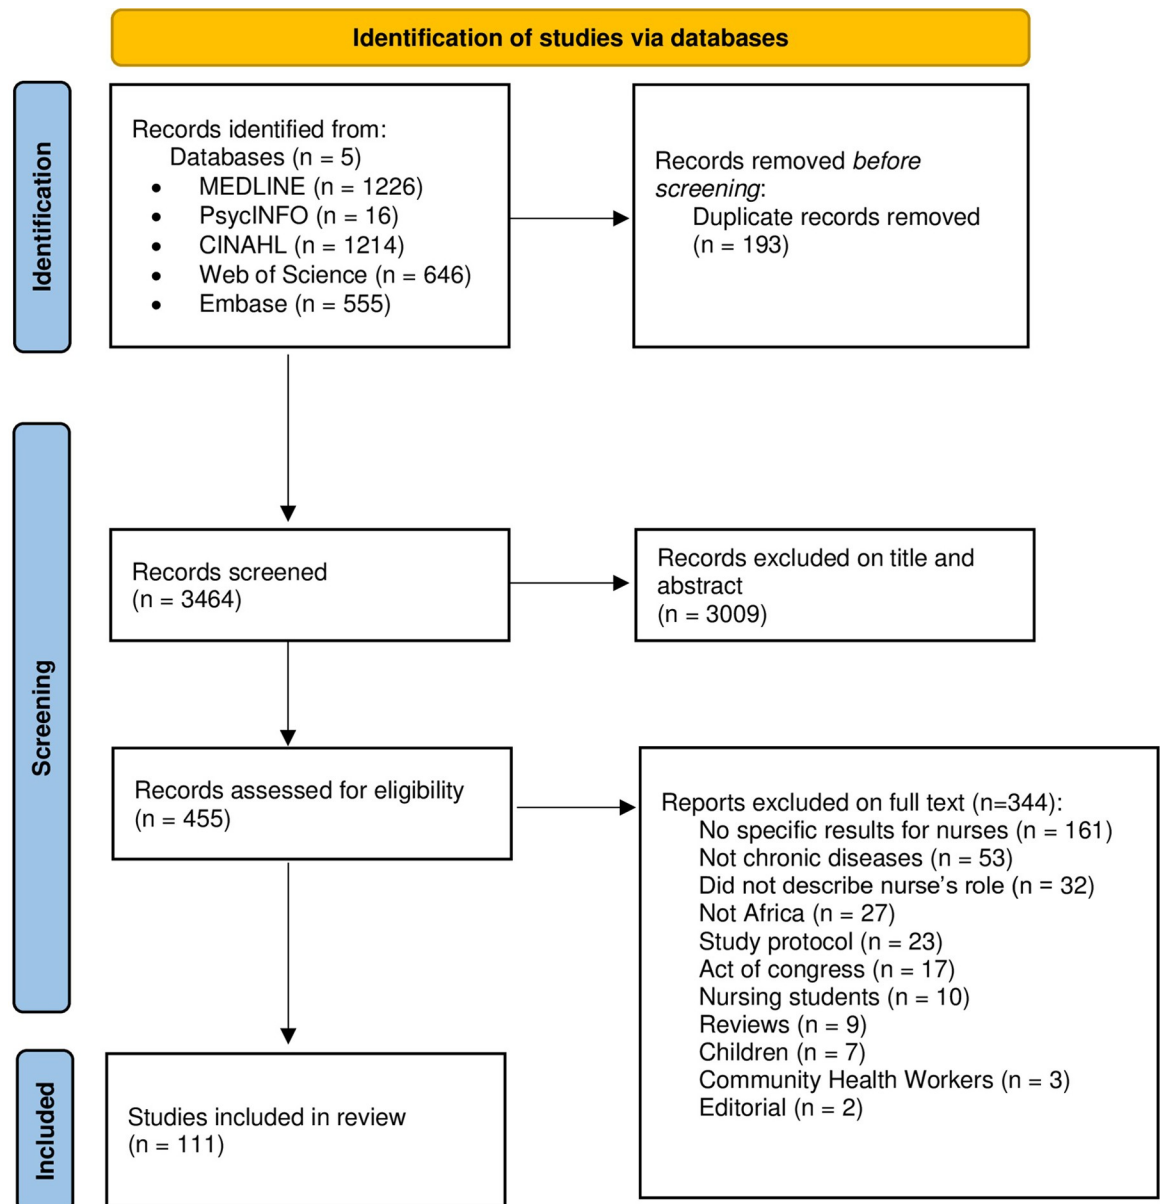

**Fig 1. PRISMA flowchart.** From: <http://www.prisma-statement.org/>.

<https://doi.org/10.1371/journal.pone.0297165.g001>

(n = 12). The studies included in our review were mainly conducted in English-speaking African countries.

### Quality assessment and limitations of the included studies

Overall, we found low-quality scores among the quantitative included studies. The median score for the Downs and Black scale was 14 (IQR: 11–17). The minimum score was 10, the maximum score was 28. Internal validity was the most concerned subscale for low scores with power calculation. Most of the studies did not calculate the sample size. The detailed Downs and Black scores for each study included in our review are presented in [S3 Table](#). Qualitative

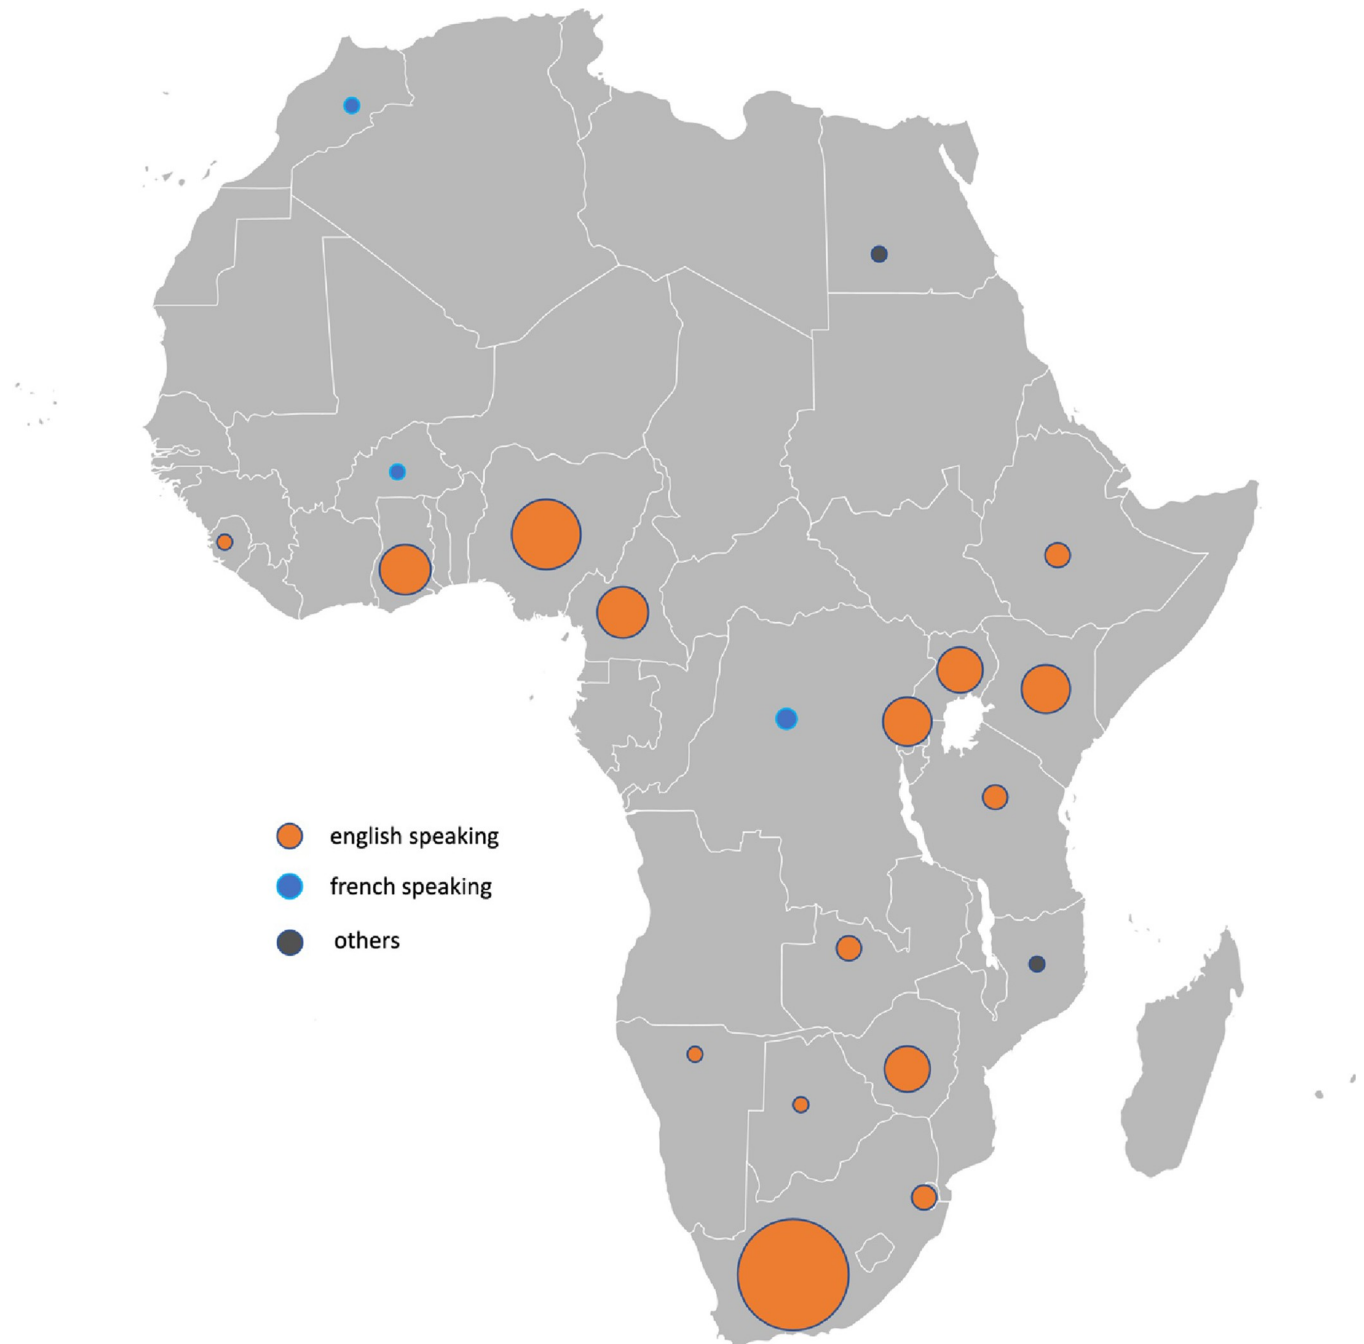

**Fig 2. Distribution of included studies regarding the number of publications and language.** Map credit: <https://commons.wikimedia.org/wiki/File:BlankMap-Africa.svg#filelinks>.

<https://doi.org/10.1371/journal.pone.0297165.g002>

studies met almost all quality standards of qualitative research regarding appropriate EQUATOR guidelines.

[S2 Table](#) shows the main limitations of the included studies. They were mainly related to small sample sizes and qualitative, non-randomized, or non-interventional studies.

## Results of the included studies

The studies included in our review were 32.4% focusing on cancer ( $n = 36$ ), 18% on cardiovascular diseases ( $n = 20$ ), 17.1% on metabolic diseases ( $n = 19$ ), 12.6% on mental illness ( $n = 14$ ), 11.7% on chronic diseases globally ( $n = 13$ ), 6.3% focusing on neurological diseases ( $n = 7$ ), and 0.9% on chronic respiratory disease and chronic kidney diseases. [S2 Table](#) describes the results of each study.

**Role and knowledge of nursing among chronic diseases.** Among the 36 studies which focused on cancer, 12 were on breast cancer [26–36], 22 on cervical cancer [37–57], one on cancer generally [58] and one on oral cancer [59]. Studies on cervical cancer were focused on nurse-led screening and treatment of human papillomavirus. Screening strategies using nurses were effective, with good agreement with medical doctors. Nurses' level of knowledge varied geographically and in a timely manner among cervical and breast cancer patients, ranging from low- to high-level knowledge. Nurse-led breast cancer screening was also implemented in a lower proportion than cervical cancer screening; however, after training, good examination skills were also identified [34], and a study focused on echography led by nurses with promising results [31].

Cardiovascular diseases were the second major topic of the included studies. There were 17 on high blood pressure [60–75], two on cardiovascular diseases globally [76, 77], and one on heart failure [78]. Nurses' knowledge of high blood pressure varied importantly, ranging from poor to good knowledge after specific training. Nurses obtained a statistically significant improvement in blood pressure; they independently screened and managed blood pressure after training, following decision trees in rural and urban areas. Echocardiography was used to screen for heart failure in a study on nurse-led heart failure screening [78].

Diabetes exclusively represented metabolic diseases [79–97]. Nurses had varying levels of knowledge about diabetes and its complications ranging from poor associated with the misconception that diabetes was a contagious disease as an example [80] to good knowledge associated with improved diabetes management [83, 84, 86, 91]. In most of the studies, nurses were trained in diagnosis and monitoring including prescribing treatments and augmentation for diabetes. Decision trees and algorithms were used for this purpose.

Thirteen studies focused on managing or knowing chronic diseases globally, or among multiple chronic diseases [85, 98–109]. Nurses' roles were similar to those described above: they managed chronic diseases, followed training with algorithms or decision trees, and supervision. They obtained positive outcomes for high blood pressure, diabetes, asthma, diabetes, sickle cell, and adherence [98, 99, 102, 104, 105, 108, 109].

Regarding mental illness, seven studies focused on mental illness globally [110–116], six on depression [117–122], and one on schizophrenia [123]. Globally, there was a gap in nurses' mental health knowledge. They improved their knowledge with training and were able to perform psychological interventions, screening, and initiation of treatment improving the mental health status and satisfaction of patients.

Studies on neurological diseases included epilepsy ( $n = 4$ ) [124–127], and post-stroke dysphagia ( $n = 3$ ) [128–130]. Studies on post-stroke dysphagia were focused on nurses' attitudes and knowledge. They found a low level of knowledge regarding the topic including diagnosis, evaluation, and treatment. Regarding epilepsy, these were interventional studies, where nurses could, after training, effectively manage epilepsy (diagnosis, treatment, and follow-up).

The two topics that were least covered were respiratory and chronic kidney diseases. A study focused on nurse-led management of asthma [131] was associated with an improvement in asthma condition in patients. One study focused on nurses' level of knowledge of chronic kidney disease which remained moderate [132].

**Challenges and gaps to nurse-led chronic diseases management.** S2 Table shows the details of the challenges and gaps identified in our review. To summarize, the main challenges identified in our review to nurse-led chronic disease management were linked to the initial nurses' knowledge gap regarding chronic diseases. The different curricula of the nurses did not include sufficient basic knowledge in each of our categories of chronic diseases. Other barriers were linked to the cost of care, shortage of nurses, lack of materials, and lack of transportation for patients.

Facilitators were also identified as key components of a well-done nurses' task-shifting strategy. The first important facilitator was training; moreover, regular training, supervision by physicians, and mentorship were the key points associated with the effective implementation of nurse-led strategies. The training should include both theoretical and practical sessions, in which training varied widely between studies, from one session for half a day to multiple and repeated sessions. Moreover, the use of decision trees or algorithms was associated with positive patient outcomes. Using an already existent system, such as HIV clinics was also a favorable strategy to implement chronic diseases care.

## Discussion

To the best of our knowledge, this scoping review represents a pioneering effort conducted in Africa to comprehensively delineate the roles and knowledge of nurses in managing NCDs. The findings of our review indicate that nurses possess varying levels of knowledge; however post-training, they demonstrate the capability to enhance the detection, treatment, and overall management of most chronic diseases. Effective task-shifting programs are achieved through essential components such as comprehensive training, ongoing supervision, and the use of decision trees, ensuring the quality of nurse-led interventions. While our review covered the major categories of chronic diseases, it is crucial to note that several subjects, such as Chronic Obstructive Pulmonary Disease and Alzheimer's disease, received limited or no investigation in Africa.

The varying levels of knowledge among nurses about different chronic diseases, ranging from low to high, reflect the gaps in their initial training and curricula. This was also found in international literature for diabetes [133] as examples. Not all nursing diplomas in Africa are at the Bachelor's level. Harmonizing the quality of higher education in nursing, as initiated by the African Union [134], is essential to improve the quality of care [135]. Increasing the level of training to the Bachelor's level and incorporating chronic disease management into the curriculum can be instrumental in enhancing nurses' capacity to manage NCDs effectively [10, 134].

Despite the variability in knowledge, our review demonstrated improved patient outcomes resulting from nursing interventions for chronic diseases. This observation aligns with existing evidence from task-shifting strategies implemented in the context of infectious diseases in Africa [17]. Numerous studies have already shown the effectiveness of nurses' task-shifting strategies [14], such as managing cardiovascular diseases [136], detecting cancer [137], and providing mental health support [138, 139]. These strategies are encouraged by the WHO to enhance NCDs management [7, 10].

The challenges and gaps identified in our review were consistent with the literature on implementation science. Adequate training, well-designed strategies, supervision, funding, leadership, and sufficient resources are the key facilitators of successful implementation [140, 141]. Addressing these factors can lead to improved chronic disease management outcomes in the African healthcare systems.

The different task-shifting strategies identified in our review have prompted us to consider the potential of expanding nurses' roles in Africa. The roles described in the studies closely



align with those of advanced practice nursing notably regarding their clinical skills [142–144]. Implementing advanced practice nursing in addition to training nurses in task-shifting strategies could be an effective or complementary solution. Although the implementation of advanced practice nursing has begun in some African countries such as South Africa and Kenya, it remains limited [145]. Scaling up the implementation of advanced practice nursing across African countries could significantly improve chronic disease management [146] and population outcomes [143].

This study has important implications for public health. First, we emphasize the potential of task shifting to nurses to enhance healthcare access, particularly in regions with healthcare professional shortages. We also highlight the effectiveness of nurse-led chronic disease management, which supports the argument for efficient healthcare models, particularly in resource-constrained settings, where cost-effectiveness is paramount. Our research also indicates that nurse-led care can have a positive impact on patient satisfaction and outcomes, advocating for a shift towards patient-centered care models. This transformation is critical for improving management of chronic diseases. Nurse-led care also enhances continuity, ensuring that patients receive sustained support, education, and follow-up. This is of utmost importance in the effective management of chronic conditions and prevention of complications. Furthermore, our study highlighted the multifaceted role of nurses, extending beyond individual patient care to community health promotion. Nurses' involvement in addressing the risk factors for chronic diseases at the community level is crucial. Moreover, our research suggests potential avenues for the development of training programs and educational initiatives designed to equip nurses with the skills and knowledge necessary for effective chronic disease management. Furthermore, our study calls for policymakers in each country to formally define, recognize, and support nurses' roles in chronic disease management. This recognition could lead to the establishment of improved regulatory frameworks and increased resources for nurse-led care. Finally, our research contributes to data-driven decision-making within healthcare systems, enabling administrators to make informed choices regarding resource allocation.

## Limitations

The results of our review must be interpreted with caution because of the relatively low quality of the included studies, particularly concerning their external validity and heterogeneity. Despite encountering studies with low scores in the Downs and Black assessment, we deliberately chose to include all the identified studies in our analysis. This decision stems from the nature of scoping reviews as a form of evidence synthesis that seeks to systematically identify and map the breadth of available evidence on a specific topic. Unlike other review types, the rigorous assessment of methodological quality is not an absolute prerequisite for scoping reviews. However, in our commitment to enhancing the quality and credibility of our research, we undertook the assessment to evaluate the methodological robustness of the included studies. This assessment was carried out to elevate the overall rigor of our study and to provide readers with a discerning evaluation of the studies' evidentiary foundation. By undertaking this assessment, our intention was to ensure a high level of transparency, integrity, and meticulousness throughout our review process. More robust studies with randomized controlled designs are needed to ascertain the effectiveness of nurse-led interventions compared to usual care. Additionally, most of the included studies were conducted in English-speaking African countries, possibly influenced by the historical link between these countries and North America, where nurses have had an expanded role and have developed university nursing curricula and research partnerships [147].

## Conclusions

We provide a comprehensive overview of nurses' knowledge and role in managing NCDs using a robust scoping review methodology, making it the first in Africa. Our findings serve as a guide for future research and offer recommendations for developing nursing programs in Africa.

Nurses can play a crucial role in addressing the shortage of doctors and the treatment gap in managing chronic diseases. However, nurses require robust training, ongoing supervision, supportive environments, and strong policies to fulfill this potential. Further research with a robust study design is necessary to conclusively assess the effectiveness of these strategies. African countries employing task-shifting strategies should consider the implementation of advanced practice nursing, as evidenced by successful examples such as the management of diabetes in South Africa.

## Supporting information

**S1 Table. Search strategy for each database included in the review.**

(DOCX)

**S2 Table. Description of the included studies.** Studies were classified according to disease type and in chronological order.

(DOCX)

**S3 Table. Downs and Black assessment for included studies.**

(DOCX)

**S1 Checklist. Preferred Reporting Items for Systematic reviews and Meta-Analyses extension for Scoping Reviews (PRISMA-ScR) checklist.**

(DOCX)

## Author Contributions

**Conceptualization:** Jean Toniolo, Edgard Brice Ngoungou, Pierre-Marie Preux, Pascale Beloni.

**Data curation:** Jean Toniolo, Edgard Brice Ngoungou, Pascale Beloni.

**Formal analysis:** Jean Toniolo, Edgard Brice Ngoungou.

**Investigation:** Jean Toniolo, Edgard Brice Ngoungou, Pierre-Marie Preux, Pascale Beloni.

**Methodology:** Jean Toniolo, Edgard Brice Ngoungou, Pierre-Marie Preux, Pascale Beloni.

**Software:** Jean Toniolo.

**Supervision:** Edgard Brice Ngoungou, Pierre-Marie Preux, Pascale Beloni.

**Validation:** Jean Toniolo, Edgard Brice Ngoungou, Pierre-Marie Preux, Pascale Beloni.

**Visualization:** Jean Toniolo, Edgard Brice Ngoungou, Pierre-Marie Preux, Pascale Beloni.

**Writing – original draft:** Jean Toniolo, Edgard Brice Ngoungou, Pierre-Marie Preux, Pascale Beloni.

**Writing – review & editing:** Jean Toniolo, Edgard Brice Ngoungou, Pierre-Marie Preux, Pascale Beloni.

## References

1. Oni T, Unwin N. Why the communicable/non-communicable disease dichotomy is problematic for public health control strategies: implications of multimorbidity for health systems in an era of health transition. *Int Health*. nov 2015; 7(6):390-9. <https://doi.org/10.1093/inthealth/ihv040> PMID: 26103981
2. Haileamlak A. The Triple Challenges of Low and Middle-Income Countries. *Ethiop J Health Sci*. janv 2018; 28(1):1-2. <https://doi.org/10.4314/ejhs.v28i1.1> PMID: 29622901
3. Bernell S, Howard SW. Use Your Words Carefully: What Is a Chronic Disease? *Front Public Health* [Internet]. 2016 [cité 9 janv 2023];4. Disponible sur: <https://www.frontiersin.org/articles/10.3389/fpubh.2016.00159>
4. World Health Organization. Integrating the response to mental disorders and other chronic diseases in health care systems [Internet]. Geneva: World Health Organization; 2014 [cité 9 janv 2023]. Disponible sur: <https://apps.who.int/iris/handle/10665/112830>
5. World Health Organization. Non communicable diseases [Internet]. 2021 [cité 6 mai 2021]. Disponible sur: <https://www.who.int/news-room/fact-sheets/detail/noncommunicable-diseases>
6. Hay SI, Abajobir AA, Abate KH, Abbafati C, Abbas KM, Abd-Allah F, et al. Global, regional, and national disability-adjusted life-years (DALYs) for 333 diseases and injuries and healthy life expectancy (HALE) for 195 countries and territories, 1990–2016: a systematic analysis for the Global Burden of Disease Study 2016. *The Lancet*. 16 sept 2017; 390(10100):1260-344. [https://doi.org/10.1016/S0140-6736\(17\)32130-X](https://doi.org/10.1016/S0140-6736(17)32130-X) PMID: 28919118
7. World Health Organization. Global strategy on human resources for health: Workforce 2030 [Internet]. World Health Organization; 2016 [cité 10 mai 2021]. Disponible sur: [http://www.who.int/hrh/resources/pub\\_globstrathrh-2030/en/](http://www.who.int/hrh/resources/pub_globstrathrh-2030/en/)
8. Willcox ML, Peersman W, Daou P, Diakité C, Bajunirwe F, Mubangizi V, et al. Human resources for primary health care in sub-Saharan Africa: progress or stagnation? *Hum Resour Health*. 10 sept 2015; 13(1):76. <https://doi.org/10.1186/s12960-015-0073-8> PMID: 26358250
9. Haakenstad A, Irvine CMS, Knight M, Bintz C, Aravkin AY, Zheng P, et al. Measuring the availability of human resources for health and its relationship to universal health coverage for 204 countries and territories from 1990 to 2019: a systematic analysis for the Global Burden of Disease Study 2019. *Lancet*. 4 juin 2022; 399(10341):2129-54. [https://doi.org/10.1016/S0140-6736\(22\)00532-3](https://doi.org/10.1016/S0140-6736(22)00532-3) PMID: 35617980
10. Mechcatie E. The WHO Highlights Nurses' Role in Reducing Noncommunicable Diseases. *AJN Am J Nurs*. sept 2018; 118(9):16-16. <https://doi.org/10.1097/01.NAJ.0000544966.05615.c0> PMID: 30138191
11. World Health Organization. Global strategic directions for nursing and midwifery 2021–2025. World Health Organization; 2021.
12. World Health Organization. Universal Health Coverage [Internet]. 2023 [cité 18 juill 2023]. Disponible sur: [https://www.who.int/news-room/fact-sheets/detail/universal-health-coverage-\(uhc\)](https://www.who.int/news-room/fact-sheets/detail/universal-health-coverage-(uhc))
13. World Health Organization, PEPFAR, UNAIDS. Task shifting: rational redistribution of tasks among health workforce teams: global recommendations and guidelines [Internet]. Geneva: World Health Organization; 2007 [cité 29 avr 2021]. Disponible sur: <https://apps.who.int/iris/handle/10665/43821>
14. Maier CB, Aiken LH. Task shifting from physicians to nurses in primary care in 39 countries: a cross-country comparative study. *Eur J Public Health*. déc 2016; 26(6):927-34. <https://doi.org/10.1093/eurpub/ckw098> PMID: 27485719
15. Bauer L, Bodenheimer T. Expanded roles of registered nurses in primary care delivery of the future. *Nurs Outlook*. 2017; 65(5):624-32. <https://doi.org/10.1016/j.outlook.2017.03.011> PMID: 28483137
16. Griffin CD. A Primary Care Nursing Perspective on Chronic Disease Prevention and Management. *Del J Public Health*. 22 mars 2017; 3(1):78-83. <https://doi.org/10.32481/djph.2017.03.011> PMID: 34466901
17. Iwu EN, Holzemer WL. Task shifting of HIV management from doctors to nurses in Africa: clinical outcomes and evidence on nurse self-efficacy and job satisfaction. *AIDS Care*. janv 2014; 26(1):42-52. <https://doi.org/10.1080/09540121.2013.793278> PMID: 23701374
18. SIDIIEF, Pépin J. L'état de la formation dans différents pays francophones - 2018. Étude réalisée par le Centre d'innovation en formation infirmière. *Bibl Arch Can* [Internet]. 2019 [cité 6 déc 2024]; Disponible sur: <https://www.sidiief.org/wp-content/uploads/2019/07/2019-Etat-Formation-2018-web.pdf>
19. West African Health Organisation. Harmonized training curriculum for nurses and midwives in ECO-WAS region [Internet]. 2014. Disponible sur: <https://www.wahooas.org/web-oaas/sites/default/files/publications/1093/curriculumharmonisedeformationdesinfirmiersetsage-femmes.pdf>
20. Munn Z, Peters MDJ, Stern C, Tufanaru C, McArthur A, Aromataris E. Systematic review or scoping review? Guidance for authors when choosing between a systematic or scoping review approach. *BMC*

- Med Res Methodol. 19 nov 2018; 18(1):143. <https://doi.org/10.1186/s12874-018-0611-x> PMID: 30453902
21. Higgins JPT, Thomas J, Chandler J, Cumpston M, Li T, Page M, et al. *Cochrane Handbook for Systematic Reviews of Intervention*. 2nd Edition. Chichester, West Sussex, UK; Ames, Iowa: John Wiley & Sons; 2019.
  22. Cohen JF, Deeks JJ, Hooft L, Salameh JP, Korevaar DA, Gatsonis C, et al. Preferred reporting items for journal and conference abstracts of systematic reviews and meta-analyses of diagnostic test accuracy studies (PRISMA-DTA for Abstracts): checklist, explanation, and elaboration. *BMJ*. 15 mars 2021; 372:n265. <https://doi.org/10.1136/bmj.n265> PMID: 33722791
  23. Bramer WM, Rethlefsen ML, Kleijnen J, Franco OH. Optimal database combinations for literature searches in systematic reviews: a prospective exploratory study. *Syst Rev*. déc 2017; 6(1):245. <https://doi.org/10.1186/s13643-017-0644-y> PMID: 29208034
  24. Downs SH, Black N. The feasibility of creating a checklist for the assessment of the methodological quality both of randomised and non-randomised studies of health care interventions. *J Epidemiol Community Health*. 1 juin 1998; 52(6):377-84. <https://doi.org/10.1136/jech.52.6.377> PMID: 9764259
  25. Tong A, Sainsbury P, Craig J. Consolidated criteria for reporting qualitative research (COREQ): a 32-item checklist for interviews and focus groups. *Int J Qual Health Care J Int Soc Qual Health Care*. déc 2007; 19(6):349-57. <https://doi.org/10.1093/intqhc/mzm042> PMID: 17872937
  26. Akhigbe AO, Omuemu VO. Knowledge, attitudes and practice of breast cancer screening among female health workers in a Nigerian urban city. *BMC Cancer*. 25 juin 2009; 9:203. <https://doi.org/10.1186/1471-2407-9-203> PMID: 19555506
  27. Awodele O, Adeyomoye A a. O, Oreagba IA, Dolapo DC, Anisu DF, Kolawole SO, et al. Knowledge, attitude and practice of breast cancer screening among nurses in Lagos University Teaching Hospital, Lagos Nigeria. *Niger Q J Hosp Med*. juin 2009; 19(2):114-8. PMID: 20836312
  28. Ibrahim NA, Odusanya OO. Knowledge of risk factors, beliefs and practices of female healthcare professionals towards breast cancer in a tertiary institution in Lagos, Nigeria. *BMC Cancer*. 4 mars 2009; 9:76. <https://doi.org/10.1186/1471-2407-9-76> PMID: 19261179
  29. Bello TO, Olugbenga-Bello AI, Oguntola AS, Adeoti ML, Ojemakinde OM. Knowledge and practice of breast cancer screening among female nurses and lay women in Osogbo, Nigeria. *West Afr J Med*. août 2011; 30(4):296-300. PMID: 22669837
  30. Ghanem S, Glaoui M, Elkhoayali S, Mesmoudi M, Boutayeb S, Errihani H. Knowledge of risk factors, beliefs and practices of female healthcare professionals towards breast cancer, Morocco. *Pan Afr Med J*. 2011; 10:21. <https://doi.org/10.4314/pamj.v10i0.72231> PMID: 22187603
  31. Dickerson LK, Rositch AF, Lucas S, Harvey SC. Pilot Educational Intervention and Feasibility Assessment of Breast Ultrasound in Rural South Africa. *J Glob Oncol*. oct 2017; 3(5):502-8. <https://doi.org/10.1200/JGO.2016.008086> PMID: 29094089
  32. Pace LE, Dusengimana JMV, Keating NL, Hategekimana V, Rugema V, Bigirimana JB, et al. Impact of Breast Cancer Early Detection Training on Rwandan Health Workers' Knowledge and Skills. *J Glob Oncol*. sept 2018; 4:1-10. <https://doi.org/10.1200/JGO.17.00098> PMID: 30241228
  33. Pruiitt LCC, Odedina S, Anetor I, Mumuni T, Oduntan H, Ademola A, et al. Breast Cancer Knowledge Assessment of Health Workers in Ibadan, Southwest Nigeria. *JCO Glob Oncol*. mars 2020; 6:387-94. <https://doi.org/10.1200/JGO.19.00260> PMID: 32125900
  34. O'Neil DS, Nxumalo S, Ngcamphalala C, Sharp G, Jacobson JS, Nuwagaba-Biribonwoha H, et al. Breast Cancer Early Detection in Eswatini: Evaluation of a Training Curriculum and Patient Receipt of Recommended Follow-Up Care. *JCO Glob Oncol*. août 2021; 7:1349-57. <https://doi.org/10.1200/GO.21.00124> PMID: 34491814
  35. Mango VL, Olasehinde O, Omisore AD, Wuraola FO, Famurewa OC, Sevilimedu V, et al. The iBreast-Exam versus clinical breast examination for breast evaluation in high risk and symptomatic Nigerian women: a prospective study. *Lancet Glob Health*. avr 2022; 10(4):e555-63. [https://doi.org/10.1016/S2214-109X\(22\)00030-4](https://doi.org/10.1016/S2214-109X(22)00030-4) PMID: 35303464
  36. Getachew S, Addissie A, Seife E, Wakuma T, Unverzagt S, Jemal A, et al. Breast Nurse Intervention to Improve Adherence to Endocrine Therapy Among Breast Cancer Patients in South Ethiopia. *The Oncologist*. 5 août 2022; 27(8):e650-60. <https://doi.org/10.1093/oncolo/oyac081> PMID: 35524760
  37. Ayinde OA, Omigbodun AO. Knowledge, attitude and practices related to prevention of cancer of the cervix among female health workers in Ibadan. *J Obstet Gynaecol J Inst Obstet Gynaecol*. janv 2003; 23(1):59-62. <https://doi.org/10.1080/0144361021000043272> PMID: 12623487
  38. Anya SE, Oshi DC, Nwosu SO, Anya AE. Knowledge, attitude, and practice of female health professionals regarding cervical cancer and Pap smear. *Niger J Med J Natl Assoc Resid Dr Niger*. sept 2005; 14(3):283-6. PMID: 16350698

39. Sangwa-Lugoma G, Mahmud S, Nasr SH, Liaras J, Kayembe PK, Tozin RR, et al. Visual inspection as a cervical cancer screening method in a primary health care setting in Africa. *Int J Cancer*. 15 sept 2006; 119(6):1389-95. <https://doi.org/10.1002/ijc.21972> PMID: 16619217
40. Udigwe GO. Knowledge, attitude and practice of cervical cancer screening (pap smear) among female nurses in Nnewi, South Eastern Nigeria. *Niger J Clin Pract*. juin 2006; 9(1):40-3. PMID: 16986288
41. Awodele O, Adeyomoye A a. A, Awodele DF, Kwashi V, Awodele IO, Dolapo DC. A study on cervical cancer screening amongst nurses in Lagos University Teaching Hospital, Lagos, Nigeria. *J Cancer Educ Off J Am Assoc Cancer Educ*. sept 2011; 26(3):497-504.
42. Urasa M, Darj E. Knowledge of cervical cancer and screening practices of nurses at a regional hospital in Tanzania. *Afr Health Sci*. mars 2011; 11(1):48-57.
43. Arulogun OS, Maxwell OO. Perception and utilization of cervical cancer screening services among female nurses in University College Hospital, Ibadan, Nigeria. *Pan Afr Med J*. 2012; 11:69. PMID: 22655103
44. Moon TD, Silva-Matos C, Cordoso A, Baptista AJ, Sidat M, Vermund SH. Implementation of cervical cancer screening using visual inspection with acetic acid in rural Mozambique: successes and challenges using HIV care and treatment programme investments in Zambézia Province. *J Int AIDS Soc*. 18 juin 2012; 15(2):17406.
45. Mwanahamuntu MH, Sahasrabuddhe VV, Blevins M, Kapambwe S, Shepherd BE, Chibwesa C, et al. Utilization of cervical cancer screening services and trends in screening positivity rates in a « screen-and-treat » program integrated with HIV/AIDS care in Zambia. *PloS One*. 2013; 8(9):e74607. <https://doi.org/10.1371/journal.pone.0074607> PMID: 24058599
46. Wamai RG, Ayissi CA, Oduwo GO, Perlman S, Welty E, Welty T, et al. Awareness, knowledge and beliefs about HPV, cervical cancer and HPV vaccines among nurses in Cameroon: an exploratory study. *Int J Nurs Stud*. oct 2013; 50(10):1399-406. <https://doi.org/10.1016/j.ijnurstu.2012.12.020> PMID: 23395482
47. Firnhaber C, Mao L, Levin S, Faesen M, Lewis DA, Goeieman BJ, et al. Evaluation of a cervicography-based program to ensure quality of visual inspection of the cervix in HIV-infected women in Johannesburg, South Africa. *J Low Genit Tract Dis*. janv 2015; 19(1):7-11. <https://doi.org/10.1097/LGT.000000000000040> PMID: 24914887
48. Manga S, Parham G, Benjamin N, Nulah K, Sheldon LK, Welty E, et al. Cervical Cancer Screening in Cameroon: Interobserver Agreement on the Interpretation of Digital Cervicography Results. *J Low Genit Tract Dis*. oct 2015; 19(4):288-94. <https://doi.org/10.1097/LGT.000000000000133> PMID: 26164295
49. DeGregorio G, Manga S, Kiyang E, Manjuh F, Bradford L, Cholli P, et al. Implementing a Fee-for-Service Cervical Cancer Screening and Treatment Program in Cameroon: Challenges and Opportunities. *The Oncologist*. juill 2017; 22(7):850-9. <https://doi.org/10.1634/theoncologist.2016-0383> PMID: 28536303
50. Dareng EO, Olaniyan Y, Odotola MK, Adebamowo SN, Famooto A, Offiong R, et al. Secular trend in interobserver agreement of VIA diagnosis for cervical cancer screening in Nigeria. *PloS One*. 2018; 13(12):e0208531. <https://doi.org/10.1371/journal.pone.0208531> PMID: 30521595
51. Williams MS, Kenu E, Dzubey I, Dennis-Antwi JA, Fontaine K. A qualitative study of cervical cancer and cervical cancer screening awareness among nurses in Ghana. *Health Care Women Int*. mai 2018; 39(5):584-94. <https://doi.org/10.1080/07399332.2018.1424169> PMID: 29334011
52. Asgary R, Cole H, Adongo P, Nwameme A, Maya E, Adu-Amankwah A, et al. Acceptability and implementation challenges of smartphone-based training of community health nurses for visual inspection with acetic acid in Ghana: mHealth and cervical cancer screening. *BMJ Open*. 16 juill 2019; 9(7):e030528. <https://doi.org/10.1136/bmjopen-2019-030528> PMID: 31315879
53. Ndikom CM, Ofi BA, Omokhodion FO, Bakare PO, Adetayo CO. Effects of Educational Intervention on Nurses' Knowledge and Attitude Towards Providing Cervical Cancer Screening Information in Selected Health Facilities in Ibadan, Nigeria. *J Cancer Educ Off J Am Assoc Cancer Educ*. févr 2019; 34(1):59-65. <https://doi.org/10.1007/s13187-017-1267-7> PMID: 28801880
54. Fokom Domgue J, Futuh B, Ngalla C, Kakute P, Manjuh F, Manga S, et al. Feasibility of a community-based cervical cancer screening with « test and treat » strategy using self-sample for an HPV test: Experience from rural Cameroon, Africa. *Int J Cancer*. 1 juill 2020; 147(1):128-38. <https://doi.org/10.1002/ijc.32746> PMID: 31633801
55. Mkhonta SS, Shirinde J. Registered nurses' perspectives on barriers of cervical cancer screening in Swaziland: a qualitative study. *Pan Afr Med J*. 2021; 38:295. <https://doi.org/10.11604/pamj.2021.38.295.22431> PMID: 34178214

56. Obol JH, Lin S, Obwolo MJ, Harrison R, Richmond R. Knowledge, attitudes, and practice of cervical cancer prevention among health workers in rural health centres of Northern Uganda. *BMC Cancer*. 3 févr 2021; 21(1):110. <https://doi.org/10.1186/s12885-021-07847-z> PMID: 33535977
57. Chitha W, Sibulawa S, Funani I, Swartbooi B, Maake K, Hellebo A, et al. A cross-sectional study of knowledge, attitudes, barriers and practices of cervical cancer screening among nurses in selected hospitals in the Eastern Cape Province, South Africa. *BMC Womens Health*. 9 mars 2023; 23(1):94. <https://doi.org/10.1186/s12905-023-02251-0> PMID: 36894910
58. Taj M, Ukani H, Lalani B, Madhani N, Khan ZS, Zaidi F, et al. Blended Oncology Nursing Training: A Quality Initiative in East Africa. *Semin Oncol Nurs*. août 2022; 38(4):151299. <https://doi.org/10.1016/j.soncn.2022.151299> PMID: 35659153
59. Rwamugira J, Maree JE. The findings of a nurse-lead intervention for detection and prevention of oral cancer. A pilot study. *Eur J Cancer Care (Engl)*. mars 2012; 21(2):266-73. <https://doi.org/10.1111/j.1365-2354.2011.01310.x> PMID: 22111655
60. Bassett T, Ndro EZ, Mhadzemira A, Mbengeranwa OL. Hypertension control in Harare municipal clinics. *Cent Afr J Med*. juill 1990; 36(7):176-80. PMID: 2272087
61. Kengne AP, Awah PK, Fezeu LL, Sobngwi E, Mbanya JC. Primary health care for hypertension by nurses in rural and urban sub-Saharan Africa. *J Clin Hypertens Greenwich Conn*. oct 2009; 11(10):564-72. <https://doi.org/10.1111/j.1751-7176.2009.00165.x> PMID: 19817937
62. Vedanthan R, Tuikong N, Kofler C, Blank E, Kamano JH, Naanyu V, et al. Barriers and Facilitators to Nurse Management of Hypertension: A Qualitative Analysis from Western Kenya. *Ethn Dis*. 2016; 26(3):315-22. <https://doi.org/10.18865/ed.26.3.315> PMID: 27440970
63. Vedanthan R, Kumar A, Kamano JH, Chang H, Raymond S, Too K, et al. Effect of Nurse-Based Management of Hypertension in Rural Western Kenya. *Glob Heart*. 2020; 15(1):77. <https://doi.org/10.5334/gh.856> PMID: 33299773
64. Blackstone S, Iwelunmor J, Plange-Rhule J, Gyamfi J, Quakyi NK, Ntim M, et al. Sustaining Nurse-Led Task-Shifting Strategies for Hypertension Control: A Concept Mapping Study to Inform Evidence-Based Practice. *Worldviews Evid Based Nurs*. 2017; 14(5):350-7. <https://doi.org/10.1111/wvn.12230> PMID: 28449387
65. Gyamfi J, Plange-Rhule J, Iwelunmor J, Lee D, Blackstone SR, Mitchell A, et al. Training nurses in task-shifting strategies for the management and control of hypertension in Ghana: a mixed-methods study. *BMC Health Serv Res*. 2 févr 2017; 17(1):104. <https://doi.org/10.1186/s12913-017-2026-5> PMID: 28148255
66. Gyamfi J, Allegrante JP, Iwelunmor J, Williams O, Plange-Rhule J, Blackstone S, et al. Application of the Consolidated Framework for Implementation Research to examine nurses' perception of the task shifting strategy for hypertension control trial in Ghana. *BMC Health Serv Res*. 29 janv 2020; 20(1):65. <https://doi.org/10.1186/s12913-020-4912-5> PMID: 31996195
67. Lulebo AM, Kaba DK, Atake SEH, Mapatano MA, Mafuta EM, Mampunza JM, et al. Task shifting in the management of hypertension in Kinshasa, Democratic Republic of Congo: a cross-sectional study. *BMC Health Serv Res*. 4 déc 2017; 17(Suppl 2):698. <https://doi.org/10.1186/s12913-017-2645-x> PMID: 29219082
68. Wahab KW, Owolabi M, Akinyemi R, Jenkins C, Arulogun O, Akpa O, et al. Short-term pilot feasibility study of a nurse-led intervention to improve blood pressure control after stroke in Nigeria. *J Neurol Sci*. 2017; 377:116-20. <https://doi.org/10.1016/j.jns.2017.04.005> PMID: 28477678
69. Ogedegbe G, Plange-Rhule J, Gyamfi J, Chaplin W, Ntim M, Apusiga K, et al. Health insurance coverage with or without a nurse-led task shifting strategy for hypertension control: A pragmatic cluster randomized trial in Ghana. *PLoS Med*. 2018; 15(5):e1002561.
70. Sarfo F, Treiber F, Gebregziabher M, Adamu S, Patel S, Nichols M, et al. PINGS (Phone-Based Intervention Under Nurse Guidance After Stroke): Interim Results of a Pilot Randomized Controlled Trial. *Stroke*. 2018; 49(1):236-9. <https://doi.org/10.1161/STROKEAHA.117.019591> PMID: 29222227
71. Shanko K, Balcha F, Parry E, Mortimore A, Osmond C, Phillips D, et al. Managing hypertension in nurse-led primary care clinics in rural Ethiopia. *Ethiop J Health Dev*. 2018; 32(2).
72. Spies LA, Gray J, Opollo JG, Mbalinda S, Nabirye R, Asher CA. Transformational leadership as a framework for nurse education about hypertension in Uganda. *Nurse Educ Today*. 2018; 64:172-4. <https://doi.org/10.1016/j.nedt.2018.02.009> PMID: 29500997
73. Adler AJ, Laar A, Prieto-Merino D, Der RMM, Mangortey D, Dirks R, et al. Can a nurse-led community-based model of hypertension care improve hypertension control in Ghana? Results from the ComHIP cohort study. *BMJ Open*. 2019; 9(4):e026799. <https://doi.org/10.1136/bmjopen-2018-026799> PMID: 30944139
74. Bolarinwa OA, Juni MH, Nor Afiah MZ, Salmiah MS, Akande TM. Mid-term impact of home-based follow-up care on health-related quality of life of hypertensive patients at a teaching hospital in Ilorin,

- Nigeria. *Niger J Clin Pract.* 2019; 22(1):69-78. [https://doi.org/10.4103/njcp.njcp\\_246\\_17](https://doi.org/10.4103/njcp.njcp_246_17) PMID: 30666023
75. Spies LA, Mulenga JM. Provider Perceptions about Hypertension: A Mixed Methods Study in Zambia. *Clin Nurs Res.* 2021; 30(2):200-6. <https://doi.org/10.1177/1054773820904634> PMID: 32043376
  76. Haykin LA, Francke JA, Abapali A, Yakubu E, Dambayi E, Jackson EF, et al. Adapting a nurse-led primary care initiative to cardiovascular disease control in Ghana: a qualitative study. *BMC Public Health.* 24 mai 2020; 20(1):745. <https://doi.org/10.1186/s12889-020-08529-4> PMID: 32448243
  77. Kgatla MN, Mothiba TM, Sodi T, Makgahlela M. Nurses' Experiences in Managing Cardiovascular Disease in Selected Rural and Peri-Urban Clinics in Limpopo Province, South Africa. *Int J Environ Res Public Health.* mars 2021; 18(5):2570. <https://doi.org/10.3390/ijerph18052570> PMID: 33806589
  78. Kwan GF, Bukhman AK, Miller AC, Ngoga G, Mucumbitsi J, Bavuma C, et al. A simplified echocardiographic strategy for heart failure diagnosis and management within an integrated noncommunicable disease clinic at district hospital level for sub-Saharan Africa. *JACC Heart Fail.* juin 2013; 1(3):230-6. <https://doi.org/10.1016/j.jchf.2013.03.006> PMID: 24621875
  79. Goodman GR, Zwarenstein MF, Robinson II, Levitt NS. Staff knowledge, attitudes and practices in public sector primary care of diabetes in Cape Town. *South Afr Med J Suid-Afr Tydskr Vir Geneesk.* mars 1997; 87(3):305-9. PMID: 9137343
  80. Koura MR, Khairy AE, Abdel-Aal NM, Mohamed HF, Amin GA, Sabra AY. The role of primary health care in patient education for diabetes control. *J Egypt Public Health Assoc.* 2001; 76(3-4):241-64. PMID: 17216945
  81. Louwagie GM, Bachmann MO, Reid M. Formal clinical primary health care training. Does it make a difference? *Curationis.* nov 2002; 25(4):32-7.
  82. van de Sande M, Dippenaar H, Rutten GEHM. The relationship between patient education and glycaemic control in a South African township. *Prim Care Diabetes.* 2007; 1(2):87-91.
  83. Gill GV, Price C, Shandu D, Dedicoat M, Wilkinson D. An effective system of nurse-led diabetes care in rural Africa. *Diabet Med J Br Diabet Assoc.* 2008; 25(5):606-11. <https://doi.org/10.1111/j.1464-5491.2008.02421.x> PMID: 18445175
  84. Mutea NK, Baker CM. Kenyan nurses' involvement in managing hospitalized diabetic patients. *Int J Nurs Pract.* 2008; 14(1):40-6. <https://doi.org/10.1111/j.1440-172X.2007.00660.x> PMID: 18190483
  85. Kengne AP, Sobngwi E, Fezeu L, Awah PK, Dongmo S, Mbanya JC, et al. Setting-up nurse-led pilot clinics for the management of non-communicable diseases at primary health care level in resource-limited settings of Africa. *Pan Afr Med J.* 24 oct 2009; 3:10. PMID: 21532719
  86. Price C, Shandu D, Dedicoat M, Wilkinson D, Gill GV. Long-term glycaemic outcome of structured nurse-led diabetes care in rural Africa. *QJM Mon J Assoc Physicians.* 2011; 104(7):571-4. <https://doi.org/10.1093/qjmed/hcr005> PMID: 21278061
  87. Matimba A, Woodward R, Tambo E, Ramsay M, Gwanzura L, Guramatunhu S. Tele-ophthalmology: Opportunities for improving diabetes eye care in resource- and specialist-limited Sub-Saharan African countries. *J Telemed Telecare.* 2016; 22(5):311-6. <https://doi.org/10.1177/1357633X15604083> PMID: 26407990
  88. Essien O, Otu A, Umoh V, Enang O, Hicks JP, Walley J. Intensive Patient Education Improves Glycaemic Control in Diabetes Compared to Conventional Education: A Randomised Controlled Trial in a Nigerian Tertiary Care Hospital. *PloS One.* 2017; 12(1):e0168835. <https://doi.org/10.1371/journal.pone.0168835> PMID: 28045979
  89. Ndayisaba A, Harerimana E, Borg R, Miller AC, Kirk CM, Hann K, et al. A Clinical Mentorship and Quality Improvement Program to Support Health Center Nurses Manage Type 2 Diabetes in Rural Rwanda. *J Diabetes Res.* 2017; 2017:2657820. <https://doi.org/10.1155/2017/2657820> PMID: 29362719
  90. Garanet F, Baguiya A, Sawadogo N, Besancon S, Traoré AS, Drabo J, et al. [Educational practices and diabetes study of health professionals in Burkina Faso and Mali]. *Sante Publique Vandoeuvre—Nancy Fr.* 2018; 30(5):713-23.
  91. Asante E, Bam V, Diji AKA, Lomotey AY, Owusu Boateng A, Sarfo-Kantanka O, et al. Pilot Mobile Phone Intervention in Promoting Type 2 Diabetes Management in an Urban Area in Ghana: A Randomized Controlled Trial. *Diabetes Educ.* 2020; 46(5):455-64. <https://doi.org/10.1177/0145721720954070> PMID: 32998649
  92. Bosun-Arije FS, Ling J, Graham Y, Hayes C. Organisational factors influencing non-pharmacological management of type 2 diabetes mellitus (T2DM) in public hospitals across Lagos, Nigeria: A qualitative study of nurses' perspectives. *Diabetes Res Clin Pract.* août 2020; 166:108288. <https://doi.org/10.1016/j.diabres.2020.108288> PMID: 32615277

93. Kuguyo O, Muhaso C, Nyandoro S, Chirenda J, Chikwasha V, Mageza AC, et al. Perspectives of healthcare workers on factors influencing diabetes management and diabetic foot problems in Zimbabwe. *J Endocrinol Metab Diabetes South Afr.* 1 sept 2020; 25(3):57-62.
94. O'Brien C, van Rooyen D, Ricks E. Self-management of persons living with diabetes mellitus type 2: Experiences of diabetes nurse educators. *Health SA SA Gesondheid.* 2020; 25:1381. <https://doi.org/10.4102/hsag.v25i0.1381> PMID: 33354356
95. Balcha Hailu F, Hjortdahl P, Moen A. Effect of locally-contextualized nurse-led diabetes self-management education on psychosocial health and quality of life: A controlled before-after study. *Int J Afr Nurs Sci.* 1 janv 2021; 15:100325.
96. Tamiru S, Dugassa M, Amsalu B, Bidira K, Bacha L, Tsegaye D. Effects of Nurse-Led diabetes Self-Management education on Self-Care knowledge and Self-Care behavior among adult patients with type 2 diabetes mellitus attending diabetes follow up clinic: A Quasi-Experimental study design. *Int J Afr Nurs Sci.* 2023; 18:100548.
97. Korsah KA, Abdulai E, Dzansi G, Gamor N. Perception of nurses on the use of mobile phone text messaging for the management of diabetes mellitus in rural Ghana. *Nurs Open.* mai 2023; 10(5):3415-23. <https://doi.org/10.1002/nop2.1596> PMID: 36611225
98. Coleman R, Gill G, Wilkinson D. Noncommunicable disease management in resource-poor settings: a primary care model from rural South Africa. *Bull World Health Organ.* 1998; 76(6):633-40. PMID: 10191559
99. Mamo Y, Seid E, Adams S, Gardiner A, Parry E. A primary healthcare approach to the management of chronic disease in Ethiopia: an example for other countries. *Clin Med Lond Engl.* juin 2007; 7(3):228-31.
100. Katz I, Schneider H, Shezi Z, Mdeleleni G, Gerntholtz T, Butler O, et al. Managing type 2 diabetes in Soweto-The South African Chronic Disease Outreach Program experience. *Prim Care Diabetes.* août 2009; 3(3):157-64. <https://doi.org/10.1016/j.pcd.2009.06.007> PMID: 19640820
101. Parker WA, Steyn NP, Levitt NS, Lombard CJ. They think they know but do they? Misalignment of perceptions of lifestyle modification knowledge among health professionals. *Public Health Nutr.* août 2011; 14(8):1429-38. <https://doi.org/10.1017/S1368980009993272> PMID: 20105391
102. Khabala KB, Edwards JK, Baruani B, Sirengo M, Musembi P, Kosgei RJ, et al. Medication Adherence Clubs: a potential solution to managing large numbers of stable patients with multiple chronic diseases in informal settlements. *Trop Med Int Health TM IH.* 2015; 20(10):1265-70. <https://doi.org/10.1111/tmi.12539> PMID: 25962952
103. Maimela E, Van Geertruyden JP, Alberts M, Modjadji SEP, Meulemans H, Fraeyman J, et al. The perceptions and perspectives of patients and health care providers on chronic diseases management in rural South Africa: a qualitative study. *BMC Health Serv Res.* avr 2015; 15(1):1-12. <https://doi.org/10.1186/s12913-015-0812-5> PMID: 25880727
104. Malan Z, Mash B, Everett-Murphy K. Evaluation of a training programme for primary care providers to offer brief behaviour change counselling on risk factors for non-communicable diseases in South Africa. *Patient Educ Couns.* janv 2016; 99(1):125-31. <https://doi.org/10.1016/j.pec.2015.08.008> PMID: 26324109
105. Some D, Edwards JK, Reid T, Van den Bergh R, Kosgei RJ, Wilkinson E, et al. Task Shifting the Management of Non-Communicable Diseases to Nurses in Kibera, Kenya: Does It Work? *PloS One.* 2016; 11(1):e0145634. <https://doi.org/10.1371/journal.pone.0145634> PMID: 26812079
106. Ameh S, Klipstein-Grobusch K, D'ambruoso L, Kahn K, Tollman SM, Gómez-Olivé FX. Quality of integrated chronic disease care in rural South Africa: user and provider perspectives. *Health Policy Plan.* mars 2017; 32(2):257-66. <https://doi.org/10.1093/heapol/czw118> PMID: 28207046
107. Mahomed OH, Asmall S. Professional nurses' perceptions and experiences with the implementation of an integrated chronic care model at primary healthcare clinics in South Africa. *Curationis.* mars 2017; 40(1):1-6. <https://doi.org/10.4102/curationis.v40i1.1708> PMID: 28582981
108. Sharp A, Riches N, Mims A, Ntshalintshali S, McConalogue D, Southworth P, et al. Decentralising NCD management in rural southern Africa: evaluation of a pilot implementation study. *BMC Public Health.* 2020; 20(1):44. <https://doi.org/10.1186/s12889-019-7994-4> PMID: 31931762
109. Niyonsenga SP, Park PH, Ngoga G, Ntaganda E, Kateera F, Gupta N, et al. Implementation outcomes of national decentralization of integrated outpatient services for severe non-communicable diseases to district hospitals in Rwanda. *Trop Med Int Health.* août 2021; 26(8):953-61. <https://doi.org/10.1111/tmi.13593> PMID: 33892521
110. Ndeti DM, Khasakhala LI, Mutiso V, Mwayo AW. Knowledge, attitude and practice (KAP) of mental illness among staff in general medical facilities in Kenya: practice and policy implications. *Afr J Psychiatry.* 2011; 14(3):225-35. <https://doi.org/10.4314/ajpsy.v14i3.6> PMID: 21863208



111. Alonso P, Price B, Conteh AR, Valle C, Turay PE, Paton L, et al. Where there is no psychiatrist: A mental health programme in Sierra Leone. *South Afr J Psychiatry*. 2014; 20(3):6.
112. Joubert PD, Bhagwan R. An empirical study of the challenging roles of psychiatric nurses at in-patient psychiatric facilities and its implications for nursing education. *Int J Afr Nurs Sci*. 1 janv 2018; 9:49-56.
113. Modula MJ, Ramukumba MM. Nurses' implementation of mental health screening among HIV infected guidelines. *Int J Afr Nurs Sci*. 1 janv 2018; 8:8-13.
114. Everitt-Penhale B, Kagee A, Magidson JF, Joska J, Safren SA, O'Cleirigh C, et al. « I went back to being myself »: acceptability of a culturally adapted task-shifted cognitive-behavioural therapy (CBT) treatment for depression (Ziphamandla) for South African HIV care settings. *Psychol Health Med*. 2019; 24(6):680-90. <https://doi.org/10.1080/13548506.2019.1566624> PMID: 30652921
115. Kemp CG, Mntambo N, Bachmann M, Bhana A, Rao D, Grant M, et al. Patient-level predictors of detection of depressive symptoms, referral, and uptake of depression counseling among chronic care patients in KwaZulu-Natal, South Africa. *Glob Ment Health*. 2020; 7:e18. <https://doi.org/10.1017/gmh.2020.11> PMID: 32913657
116. Smith SL, Franke MF, Rusangwa C, Mukasakindi H, Nyirandagijimana B, Bienvenu R, et al. Outcomes of a primary care mental health implementation program in rural Rwanda: A quasi-experimental implementation-effectiveness study. *PloS One*. 2020; 15(2):e0228854. <https://doi.org/10.1371/journal.pone.0228854> PMID: 32084663
117. Adams JL, Almond MLG, Ringo EJ, Shangali WH, Sikkema KJ. Feasibility of nurse-led antidepressant medication management of depression in an HIV clinic in Tanzania. *Int J Psychiatry Med*. 2012; 43(2):105-17. <https://doi.org/10.2190/PM.43.2.a> PMID: 22849034
118. Chetty D, Hoque ME. Effectiveness of a nurse facilitated cognitive group intervention among mild to moderately-depressed-women in KwaZulu-Natal, South Africa. *Afr J Psychiatry*. 2013; 16(1):29-34. <https://doi.org/10.4314/ajpsy.v16i1.5> PMID: 23417633
119. Wagner G, Ghosh-Dastidar B, Ngo V, Robinson E, Musisi S, Glick P, et al. A cluster randomized controlled trial of two task-shifting depression care models on depression alleviation and antidepressant response among HIV clients in Uganda. *Res Adv Psychiatry*. avr 2016; 3(1):12-21. PMID: 32661505
120. Muga T, Mbuthia G, Gatimu SM, Rossiter R. A Pilot Study Exploring Nursing Knowledge of Depression and Suicidal Ideation in Kenya. *Issues Ment Health Nurs*. janv 2019; 40(1):15-20. <https://doi.org/10.1080/01612840.2018.1489922> PMID: 30111201
121. Petersen I, Bhana A, Fairall LR, Selohilwe O, Kathree T, Baron EC, et al. Evaluation of a collaborative care model for integrated primary care of common mental disorders comorbid with chronic conditions in South Africa. *Bmc Psychiatry*. 3 avr 2019; 19:107. <https://doi.org/10.1186/s12888-019-2081-z> PMID: 30943947
122. Kathree T, Bachmann M, Bhana A, Grant M, Mntambo N, Gigaba S, et al. Management of depression in chronic care patients using a task-sharing approach in a real-world primary health care setting in south africa: Outcomes of a cohort study. *Community Ment Health J*. 24 mars 2023;
123. Kgosidintsi A. The role of the community mental health nurse in Botswana: the needs and problems of carers of schizophrenic clients in the community. *Curationis*. juin 1996; 19(2):38-42. <https://doi.org/10.4102/curationis.v19i2.1322> PMID: 9257592
124. Adamolekun B, Mielke JK, Ball DE. An evaluation of the impact of health worker and patient education on the care and compliance of patients with epilepsy in Zimbabwe. *Epilepsia*. avr 1999; 40(4):507-11. <https://doi.org/10.1111/j.1528-1157.1999.tb00749.x> PMID: 10219280
125. Adamolekun B, Mielke J, Ball D, Mundanda T. An evaluation of the management of epilepsy by primary health care nurses in Chitungwiza, Zimbabwe. *Epilepsy Res*. mai 2000; 39(3):177-81. [https://doi.org/10.1016/s0920-1211\(99\)00115-1](https://doi.org/10.1016/s0920-1211(99)00115-1) PMID: 10771243
126. Kengne AP, Fezeu LL, Awah PK, Sobngwi E, Dongmo S, Mbanya JC. Nurse-led care for epilepsy at primary level in a rural health district in Cameroon. *Epilepsia*. sept 2008; 49(9):1639-42. [https://doi.org/10.1111/j.1528-1167.2008.01580\\_2.x](https://doi.org/10.1111/j.1528-1167.2008.01580_2.x) PMID: 18782214
127. Kaddumukasa M, Nalubwama H, Kaddumukasa MN, Lhatoo S, Sewankambo N, Katabira E, et al. Barriers to epilepsy care in Central Uganda, a qualitative interview and focus group study involving PLWE and their caregivers. *BMC Neurol*. 2019; 19(1):161. <https://doi.org/10.1186/s12883-019-1398-z> PMID: 31315592
128. Rhoda A, Pickel-Voight A. Knowledge of nurses regarding dysphagia in patients post stroke in Namibia. *Curationis*. 2015; 38(2):1564. <https://doi.org/10.4102/curationis.v38i2.1564> PMID: 26842081
129. Knight K, Pillay B, Van der Linde J, Krüger E. Nurses' knowledge of stroke-related oropharyngeal dysphagia in the Eastern Cape, South Africa. *South Afr J Commun Disord Suid-Afr Tydskr Vir Kommun*. 2020; 67(1):e1-7. <https://doi.org/10.4102/sajcd.v67i1.703> PMID: 32896133

130. Pierpoint M, Pillay M. Post-stroke dysphagia: An exploration of initial identification and management performed by nurses and doctors. *South Afr J Commun Disord Suid-Afr Tydskr Vir Kommun.* 2020; 67(1):e1-13. <https://doi.org/10.4102/sajcd.v67i1.625> PMID: 32501033
131. Kengne AP, Sobngwi E, Fezeu LL, Awah PK, Dongmo S, Mbanya JC. Nurse-led care for asthma at primary level in rural sub-Saharan Africa: the experience of Bafut in Cameroon. *J Asthma Off J Assoc Care Asthma.* 2008; 45(6):437-43. <https://doi.org/10.1080/02770900802032933> PMID: 18612894
132. Emmanuel Gapira B, Chironda G, Ndahayo D, Pierre Marie Theos M, Jeanne Tuyisenge M, Rajeswaran L. Knowledge related to Chronic Kidney Disease (CKD) and perceptions on inpatient management practices among nurses at selected referral hospitals in Rwanda: A non-experimental descriptive correlational study. *Int J Afr Nurs Sci.* 1 janv 2020; 13:100203.
133. Alotaibi A, Al-Ganmi A, Gholizadeh L, Perry L. Diabetes knowledge of nurses in different countries: An integrative review. *Nurse Educ Today.* 1 avr 2016; 39:32-49. <https://doi.org/10.1016/j.nedt.2016.01.017> PMID: 27006032
134. Larue C, Pepin J, Salette H, Monette A, Boucher M. L'assurance-qualité de la formation en sciences infirmières: un levier pour l'évolution des soins [Internet]. SIDIIEF. 2022 [cité 8 janv 2023]. Disponible sur: <https://sidiief.org/produit/lassurance-qualite-de-la-formation-en-sciences-infirmieres-un-levier-pour-levolution-des-soins-2/>
135. Aiken LH. Educational Levels of Hospital Nurses and Surgical Patient Mortality. *JAMA J Am Med Assoc.* 24 sept 2003; 290(12):1617-23. <https://doi.org/10.1001/jama.290.12.1617> PMID: 14506121
136. Spies LA, Bader SG, Opollo JG, Gray J. Nurse-led interventions for hypertension: A scoping review with implications for evidence-based practice. *Worldviews Evid Based Nurs.* août 2018; 15(4):247-56. <https://doi.org/10.1111/wvn.12297> PMID: 29902358
137. Li C, Liu Y, Xue D, Chan CWH. Effects of nurse-led interventions on early detection of cancer: A systematic review and meta-analysis. *Int J Nurs Stud.* oct 2020; 110:103684. <https://doi.org/10.1016/j.ijnurstu.2020.103684> PMID: 32702568
138. Aurizki GE, Wilson I. Nurse-led task-shifting strategies to substitute for mental health specialists in primary care: A systematic review. *Int J Nurs Pract.* 2022; 28(5):e13046. <https://doi.org/10.1111/ijn.13046> PMID: 35285121
139. Petersen I, Selohilwe O, Georgeu-Pepper D, Ras CJ, Zani B, Petrus R, et al. A collaborative care package for depression comorbid with chronic physical conditions in South Africa. *BMC Health Serv Res.* 1 déc 2022; 22(1):1465. <https://doi.org/10.1186/s12913-022-08874-7> PMID: 36457094
140. McArthur C, Bai Y, Hewston P, Giangregorio L, Straus S, Papaioannou A. Barriers and facilitators to implementing evidence-based guidelines in long-term care: a qualitative evidence synthesis. *Implement Sci.* 9 juill 2021; 16(1):70. <https://doi.org/10.1186/s13012-021-01140-0> PMID: 34243789
141. Torrens C, Campbell P, Hoskins G, Strachan H, Wells M, Cunningham M, et al. Barriers and facilitators to the implementation of the advanced nurse practitioner role in primary care settings: A scoping review. *Int J Nurs Stud.* avr 2020; 104:103443. <https://doi.org/10.1016/j.ijnurstu.2019.103443> PMID: 32120089
142. Schober M. *Introduction to Advanced Nursing Practice: An International Focus.* Cham: Springer International Publishing; 2016. 166 p. (Advanced Practice in Nursing, Under the auspices of the International Council of Nurses (ICN)).
143. Morin D. *La pratique infirmière avancée: vers un consensus au sein de la francophonie.* 2018.
144. Fulton JS, Holly VW. Clinical nurse specialist role and practice: an international perspective [Internet]. 2021 [cité 5 juill 2021]. Disponible sur: <https://doi.org/10.1007/978-3-319-97103-2>
145. Christmals CD, Armstrong SJ. The essence, opportunities and threats to Advanced Practice Nursing in Sub-Saharan Africa: A scoping review. *Heliyon.* 4 oct 2019; 5(10):e02531. <https://doi.org/10.1016/j.heliyon.2019.e02531> PMID: 31667384
146. Hamric AB, éditeur. *Advanced practice nursing: an integrative approach.* 5. ed. St. Louis, Miss: Elsevier, Saunders; 2014. 726 p.
147. Bvumbwe T, Mtshali N. Nursing education challenges and solutions in Sub Saharan Africa: an integrative review. *BMC Nurs.* 31 janv 2018; 17:3. <https://doi.org/10.1186/s12912-018-0272-4> PMID: 29434521
